# Supplementary material
Source: Springer Nature journal article supplement (https://www.springermedizin.de/resource/supplementary/13643_2014_328_MOESM15_ESM.pdf/9681736)

**a**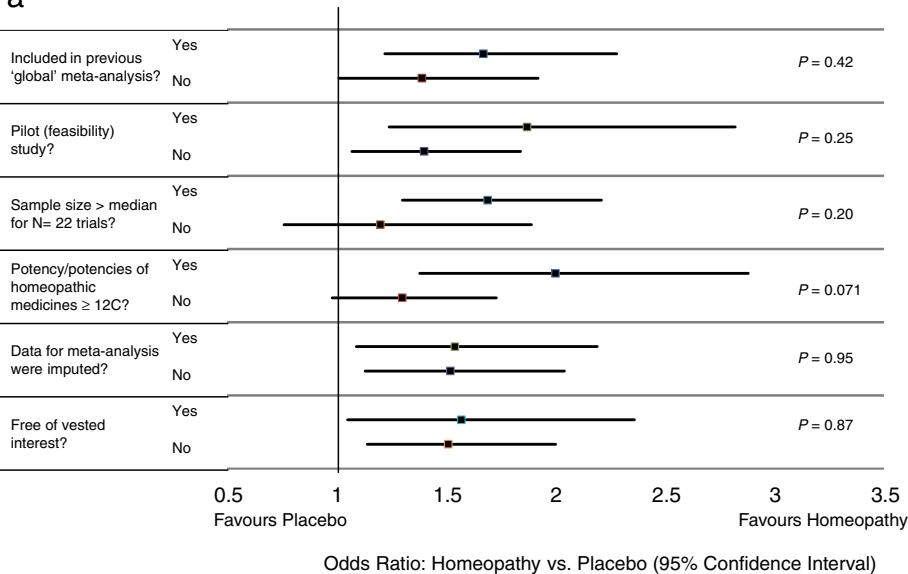**b**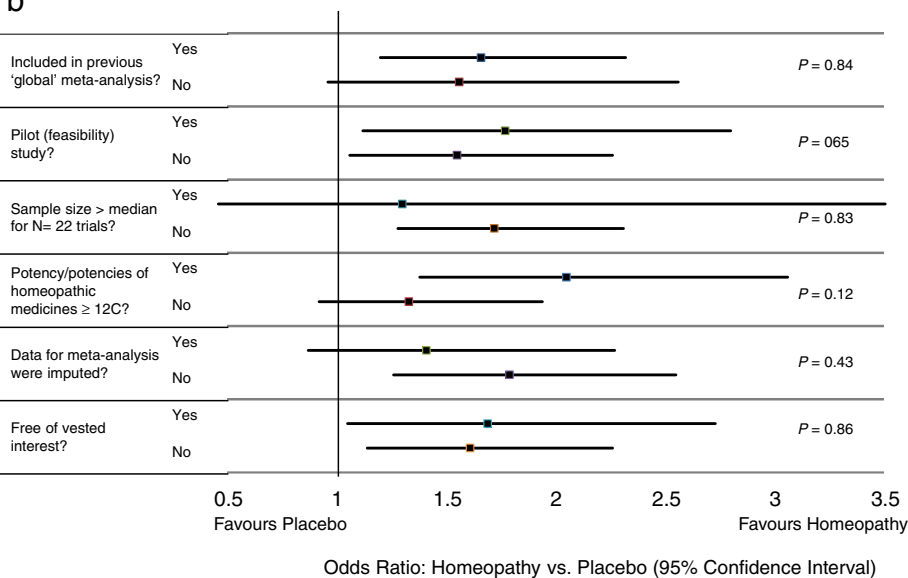

Supplement: MOESM15 [file 9681736]
